# Supplementary material for: COVID-19 infection among patients with autoinflammatory diseases: a study on 117 French patients compared with 1545 from the French RMD COVID-19 cohort: COVIMAI – the French cohort study of SARS-CoV-2 infection in patient with systemic autoinflammatory diseases
Source: PubMed Central journal article supplement — RMD Open. 2022 May 10;8(1):e002063. doi: 10.1136/rmdopen-2021-002063 (PMC9091487; doi:10.1136/rmdopen-2021-002063), 2022-05-10
Supplement: rmdopen-2021-002063supp001.pdf [file rmdopen-2021-002063supp001.pdf]

**Supplemental Table 1: Description of diagnoses of iRMD patients with and without Autoinflammatory diseases**

|                                                | n (%)           |
|------------------------------------------------|-----------------|
| <b>Autoinflammatory diseases (n=117)</b>       |                 |
| Juvenile-onset systemic still disease          | 5/117 (4.3)     |
| Unclassified Autoinflammatory disease          | 15/117 (12.8)   |
| Behçet disease                                 | 21/117 (17.9)   |
| Still disease                                  | 9/117 (7.7)     |
|                                                |                 |
| Monogenic autoinflammatory disease             | 67/117 (57.3)   |
| FMF                                            | 64/67           |
| CAPS                                           | 3/67            |
| <b>Non- Autoinflammatory diseases (n=1545)</b> |                 |
| Giant Cell arteritis                           | 37/1545 (2.4)   |
| Takayasu disease                               | 5/1545 (0.3)    |
|                                                | 30/1545 (1.9)   |
| Systemic juvenile idiopathic arthritis         |                 |
|                                                | 15/1545 (1.0)   |
| Other                                          |                 |
| Other inflammatory rheumatism                  | 19/1545 (1.2)   |
| Other spondylarthritis                         | 30/1545 (1.9)   |
| Other vasculitis                               | 21/1545 (1.4)   |
| Chondrocalcinosis                              | 1/1545 (0.1)    |
| Undifferentiated connectivite                  | 5/1545 (0.3)    |
| Mixed connectivite tissus disease              | 11/1545 (0.7)   |
| Goit                                           | 2/1545 (0.1)    |
| Uveitis                                        | 3/1545 (0.2)    |
| Systemic erythematous lupus                    | 118/1545 (7.6)  |
| IGG4 related disease                           | 4/1545 (0.3)    |
| Myositis                                       | 22/1545 (1.4)   |
| Myositis inclusion body                        | 1/1545 (0.1)    |
| Chronic recurrent multifocal osteomyelitis     | 2/1545 (0.1)    |
| Rheumatoid arthritis                           | 509/1545 (32.9) |
| Pseudorhizomelic arthritis                     | 35/1545 (2.3)   |

|                           |                 |
|---------------------------|-----------------|
| Psoriatic rheumatism      | 165/1545 (10.7) |
| Sarcoidosis               | 21/1545 (1.4)   |
| Systemic sclerosis        | 64/1545 (4.1)   |
| Spondylarthritis          | 344/1545 (22.3) |
| Sjogren syndrome          | 43/1545 (2.8)   |
| Antiphospholipid syndrome | 5/1545 (0.3)    |
| ANCA vasculitis           | 33/1545 (2.1)   |

**Supplemental table 2: Cases reports of pediatric patients**

|                                       |                  |
|---------------------------------------|------------------|
| <b>Number of patients</b>             | <b>17</b>        |
| <b>Median age</b>                     | <b>12 [3-16]</b> |
| <b>Autoinflammatory diseases</b>      |                  |
| Familial Mediterranean fever          | 7 (41%)          |
| PFAPA                                 | 2                |
| Cryopyrin associated periodic syndrom | 2                |
| DADA2                                 | 1                |
| Unclassified autoinflammatory disease | 2                |
| SJIA                                  | 3                |
| <b>Daily treatment for SAID</b>       |                  |
| Colchicine                            | 7 (41%)          |
| Adalimumab                            | 2                |
| Canakinumab                           | 1                |
| Anakinra                              | 3                |
| Tocilizumab                           | 1                |
| <b>Outcome</b>                        |                  |
| Benin form                            | 17 (100%)        |
